# Supplementary material
Source: Elsevier journal article supplement (https://comptes-rendus.academie-sciences.fr/biologies/article/10.1016/j.crvi.2009.03.007/file/attach/mmc2.pdf)
Supplement: mmc2 [file mmc2.pdf]

**TABLEAU N°4 : INVENTAIRE EXHAUSTIF DES ESPECES PSAMMOPHILES DANS LA ZONE D'ETUDE**

| Taxons                                   | Familles     | TM | TB | TBIO                 | Répartition                            |
|------------------------------------------|--------------|----|----|----------------------|----------------------------------------|
| <i>Juniperus phoenicea</i> L             | Cupressacées | LV | PH | Circum-méd           | A: dunes littorales                    |
| <i>Pinus maritima</i> Lamk.              | Pinacées     | LV | PH | Wméd                 | A:littorales jusqu'au800m              |
| <i>Ephedra fragilis</i> Desf             | Ephedracées  | HV | CH | Macar-méd            | B:littorales et continentales          |
| <i>Stipa tenacissima</i> L               | Poacées      | HV | HE | Ibero-maur           | B: littorales et continentales         |
| <i>Stipa retorta</i> Cav                 | Poacées      | HA | TH | Circum-méd           | B:littorales et continentales          |
| <i>Avena sterilis</i> L                  | Poacées      | HA | TH | Macar-méd-irano-Tour | C: dunes continentales                 |
| <i>Schismus barbatus</i> (L.) Thell.     | Poacées      | HA | TH | Macar-méd            | B:littorales et continentales          |
| <i>Bromus madritensis</i> L              | Poacées      | HA | TH | Méd                  | B: littorales et continentales         |
| <i>Briza minor</i> L                     | Poacées      | HA | TH | Thermo-Subcosmo      | B: littorales et continentales         |
| <i>Hordeum murinum</i> With.             | Poacées      | HA | TH | Circum bor           | B: littorales et continentales         |
| <i>Polypogon monpeliensis</i> (L.) Desf. | Poacées      | HA | TH | Paléo-Subtrop        | B: littorales et continentales         |
| <i>Lagurus ovatus</i> L.                 | Poacées      | HV | PH | Macar-méd            | B: littorales et continentales         |
| <i>Ammophila arenaria</i> (L.) Link.     | Poacées      | HV | GE | Circum bor           | A: dunes littorales                    |
| <i>Cynodon dactylon</i> (L.) Pers.       | Poacées      | HV | GE | Thermocosmo          | C: dunes continentales (lieux humides) |
| <i>Avena alba</i> vahl                   | Poacées      | HA | TH | Méd-Irano-Tour       | B: littorales et continentales         |
| <i>Dactylis glomerata</i> L.             | Poacées      | HV | GE | Paléo-temp           | B: littorales et continentales         |
| <i>Bromus rubens</i> L .                 | Poacées      | HA | TH | Paléo-subtrop        | B: littorales et continentales         |
| <i>Brachypodium distachyum</i> (L.) p.B. | Poacées      | HA | TH | Paléo-Subtrop        | B: littorales et continentales         |
| <i>Juncus maritimus</i> Lamk.            | Juncacées    | HV | PH | Subcosm              | B: littorales et continentales         |

|                                         |                 |    |    |                   |                                      |
|-----------------------------------------|-----------------|----|----|-------------------|--------------------------------------|
| <i>Asparagus acutifolius</i> L          | Liliacées       | HV | CH | Méd               | A: dunes littorales                  |
| <i>Asparagus stipularis</i> Forsk       | Liliacées       | HV | PH | Macar-méd         | B: littorales et continentales       |
| <i>Pancratium maritimum</i> L           | Amaryllidacées  | HV | GE | Circumméd         | A: dunes littorales                  |
| <i>Orchis morio</i> L                   | Orchidacées     | HV | GE | Euras             | A: dunes littorales                  |
| <i>Orchis maculata</i> L                | Orchidacées     | HV | GE | Macar-méd-Irlande | A: dunes littorales                  |
| <i>Rumex tingitanus</i> L               | Polygonacées    | HA | TH | Méd               | A: dunes littorales et à l'intérieur |
| <i>Paronychia argentea</i> (Pourr) Lamk | Caryophyllacées | HV | CH | Méd               | B: littorales et continentales       |
| <i>Spergularia mumbyana</i> Pomel       | Caryophyllacées | HV | CH | End               | B: littorales et continentales       |
| <i>Arenaria emarginata</i> Brot         | Caryophyllacées | HA | TH | Ib-Maur           | A: dunes littorales                  |
| <i>Silène colorata</i> L                | Caryophyllacées | HA | TH | Méd               | A: dunes littorales                  |
| <i>Silène conica</i> L                  | Caryophyllacées | HA | TH | Euras             | B: littorales et continentales       |
| <i>Silène gallica</i> L                 | Caryophyllacées | HA | TH | Paléo-temp        | B: littorales et continentales       |
| <i>Silène behen</i> L                   | Caryophyllacées | HA | TH | E méd             | A: dunes littorales                  |
| <i>Silène pseudo-atocion</i> Desf       | Caryophyllacées | HA | GE | Ibero-maur        | A: dunes littorales                  |
| <i>Clematis cirrhosa</i> L              | Renonculacées   | HA | TH | Méd               | A: dunes littorales                  |
| <i>Clematis flammula</i> L              | Renonculacées   | HA | TH | Méd               | A: dunes littorales                  |
| <i>Renonculus spicatus</i> Desf         | Renonculacées   | HA | TH | Ibero-maur-sicile | A: dunes littorales                  |
| <i>Glaucium flavum</i> Crantz           | Papavéracées    | HV | GE | Méd               | A: dunes littorales                  |
| <i>Cakile maritima</i> Scop.            | Brassicacées    | HA | TH | Eur-méd           | A: dunes littorales                  |
| <i>Biscutella auriculata</i> L          | Brassicacées    | HA | TH | Wméd              | C: dunes continentales               |
| <i>Biscutella raphanifolia</i> Poiret   | Brassicacées    | HV | HE | End E.N.A         | A: dunes littorales                  |
| <i>Lobularia maritima</i> (L) .Desv     | Brassicacées    | HA | TH | Méd               | A: dunes littorales                  |

|                                            |                |    |    |            |                                |
|--------------------------------------------|----------------|----|----|------------|--------------------------------|
| <i>Sinapsis arvensis</i> L                 | Brassicacées   | HA | TH | Paléo-temp | B: littorales et continentales |
| <i>Matthiola sinuata</i> (L.) R.Br.        | Brassicacées   | HA | TH | Méd-Atl    | A: dunes littorales            |
| <i>Matthiola tricuspidata</i> (L.) R.Br.   | Brassicacées   | HA | TH | Méd        | A: dunes littorales            |
| <i>Reseda alba</i> L                       | Resedacées     | HA | TH | Euras      | A: dunes littorales            |
| <i>Reseda phyteuma</i> L                   | Resedacées     | HV | HE | Méd        | B: littorales et continentales |
| <i>Sedum tenuifolium</i> (S.et Sm.) Strohl | Crassulacées   | HV | GE | Oro-méd    | B: littorales et continentales |
| <i>Sedum rubens</i> L                      | Crassulacées   | HA | TH | Méd        | B: littorales et continentales |
| <i>Ulex parviflorus</i> Pourret            | Fabacées       | HV | CH | Wméd       | A: dunes littorales            |
| <i>Ulex boivini</i> Webb                   | Fabacées       | HV | CH | Ibero-maur | A: dunes littorales            |
| <i>Retama monosperma</i> (L.) Boiss.       | Fabacées       | HV | CH | Ibero-maur | A: dunes littorales            |
| <i>Cytisus arboreus</i> L                  | Fabacées       | LV | PH | Wméd       | A: dunes littorales            |
| <i>Lotus ornithopoides</i> L.              | Fabacées       | HA | TH | Méd        | A: dunes littorales            |
| <i>Ebenus pinnata</i> L                    | Fabacées       | HV | PH | End N.A    | A: dunes littorales            |
| <i>Astragalus gombo</i> Coss . et Dur .    | Fabacées       | HA | TH | End N.Sah  | C: dunes continentales         |
| <i>Trifolium angustifolium</i> L.          | Fabacées       | HA | TH | Méd        | B: littorales et continentales |
| <i>Erodium hirtum</i> Desf.                | Geraniacées    | HA | TH | E.N.A      | C: Dunes continentales         |
| <i>Erodium guttatum</i> (Desf.) Willd.     | Geraniacées    | HA | TH | Sah.méd    | C: dunes continentales         |
| <i>Linum suffruticosum</i> L.              | Linacées       | HV | CH | Wméd       | C: dunes continentales         |
| <i>Oxalis pes-caprae</i> L.                | Oxalidacées    | HV | GE | Méd        | A: dunes littorales            |
| <i>Fagonia cretica</i> L.                  | Zygophyllacées | HA | TH | Méd        | C: dunes continentales         |
| <i>Ruta chalepensis</i> L.                 | Rutacées       | HV | CH | Méd        | C: dunes continentales         |
| <i>Euphorbia peplis</i> L.                 | Euphorbiacées  | HA | TH | Méd.Atl    | A: dunes littorales            |

|                                                            |               |    |    |              |                                |
|------------------------------------------------------------|---------------|----|----|--------------|--------------------------------|
| <i>Euphorbia dendroides</i> L.                             | Euphorbiacées | LV | CH | Méd          | A: dunes littorales            |
| <i>Euphorbia paralioides</i> L.                            | Euphorbiacées | HA | TH | Méd.Atl      | A: dunes littorales            |
| <i>Euphorbia segetalis</i> L.                              | Euphorbiacées | HA | TH | Méd.Atl      | A: dunes littorales            |
| <i>Mercurialis annua</i> L.                                | Euphorbiacées | HA | TH | Méd.W.As     | B: littorales et continentales |
| <i>Ziziphus lotus</i> (L.) Desf.                           | Rhamnacées    | HV | CH | Méd          | C: dunes continentales         |
| <i>Rhamnus lycioides subsp oleoides</i> L.                 | Rhamnacées    | HV | CH | Wméd         | C: dunes continentales         |
| <i>Malva aegyptiaca</i> L.                                 | Malvacées     | HA | TH | Sah-Sind.méd | C: dunes continentales         |
| <i>Lavatera arborea</i> L.                                 | Malvacées     | LV | PH | Méd          | A: dunes littorales            |
| <i>Lavatera maritima</i> Gouan                             | Malvacées     | HV | CH | Wméd         | A: dunes littorales            |
| <i>Thymelaea hirsuta</i> Endl.                             | Thymeleacées  | HA | TH | Méd          | A: dunes littorales            |
| <i>Myrtus communis</i> L.                                  | Myrtacées     | LV | PH | Méd          | A: dunes littorales            |
| <i>Eryngium ilicifolium</i> Lam.                           | Ombellifères  | HA | TH | Ibéro-Maur   | C: dunes continentales         |
| <i>Eryngium maritimum</i> L.                               | Ombellifères  | HA | TH | Eur-méd      | A: dunes littorales            |
| <i>Echinophora spinosa</i>                                 | Ombellifères  | HV | CH | Eur-méd      | A: dunes littorales            |
| <i>Daucus gummifer</i> L.                                  | Ombellifères  | HA | TH | Méd          | A: dunes littorales            |
| <i>Crithmum maritimum</i> L.                               | Ombellifères  | HV | CH | Eur-méd      | A: dunes littorales            |
| <i>Frankenia laevis subsp hirsuta</i> (L.) Fiori.          | Frankeniacees | HA | TH | Paléo-temp   | A: dunes littorales            |
| <i>Viola arborescens</i> L.                                | Violacées     | LV | PH | Wméd         | A: dunes littorales            |
| <i>Cistus heterophyllus</i> Desf.                          | Cistacées     | HV | CH | Ibéro-Maur   | A: dunes littorales            |
| <i>Tuberaria guttata subsp variabilis</i> (Willk.) R. Lit. | Cistacées     | HA | TH | Méd          | B: littorales et continentales |
| <i>Helianthemum viscarium</i> B. et R. p.p                 | Cistacées     | HV | CH | Ibero-maur   | A: dunes littorales            |
| <i>Helianthemum pilosum</i> p.p                            | Cistacées     | HV | CH | Méd          | B: littorales et continentales |

|                                                |                 |    |    |           |                                |
|------------------------------------------------|-----------------|----|----|-----------|--------------------------------|
| <i>Helianthemum apertum</i> Pomel.             | Cistacées       | HA | TH | End N.A   | C: dunes continentales         |
| <i>Erica multiflora</i> L.                     | Ericacées       | HV | CH | Méd       | A: dunes littorales            |
| <i>Limonium psilocladon</i> (Boiss.) Kuntze    | Plumbaginacées  | HA | TH | Wméd      | A: dunes littorales            |
| <i>Periploca laevigata</i> Act.                | Asclepiadiacées | HV | CH | Méd.Sah   | B: littorales et continentales |
| <i>Calystegia soldanella</i> (L.) R. Br .      | Convolvulacées  | HA | TH | Cosmop    | A: dunes littorales            |
| <i>Cerintho major subsp gymnandra</i> L.       | Borraginacées   | HA | TH | Méd       | A: dunes littorales            |
| <i>Lithospermum tenuifolium</i> L.             | Borraginacées   | HA | TH | E.méd     | B: littorales et continentales |
| <i>Vitex agnus-castus</i> L.                   | Verbénacées     | LV | PH | Méd       | B: littorales et continentales |
| <i>Teucrium fruticans</i> L .                  | Lamiacées       | LV | PH | Méd       | A: dunes littorales            |
| <i>Teucrium polium</i> L. (p.p.)               | Lamiacées       | HV | CH | Eur-méd   | B: littorales et continentales |
| <i>Lavandula stoechas</i> L.                   | Lamiacées       | HV | CH | Méd       | B: littorales et continentales |
| <i>Lavandula multifida</i> L.                  | Lamiacées       | HV | CH | Méd       | B: littorales et continentales |
| <i>Nicotiana glauca</i> Graham                 | Solanacées      | HV | CH | N.AM      | A: dunes littorales            |
| <i>Linaria mynbyana</i> Boiss. et Reut.        | Scrofulariacées | HA | TH | Ibéro-Mar | A: dunes littorales            |
| <i>Anarrhinum fruticosum</i> Desf.             | Scrofulariacées | HV | HE | W N.A     | B: littorales et continentales |
| <i>Plantago psyllium</i> L.                    | Plantaginacées  | HA | TH | Sud-Méd   | B: littorales et continentales |
| <i>Plantago ampexicaule</i> Cav.               | Plantaginacées  | HV | HE | Méd       | B: littorales et continentales |
| <i>Plantago coronopus subsp macrorrhiza</i> L. | Plantaginacées  | HA | TH | Euras     | A: dunes littorales            |
| <i>Evax argentea</i> Pomel.                    | Astéracées      | HA | TH | N.A.Trip  | B: littorales et continentales |
| <i>Evax pygmaea</i> (L.) Brot.                 | Astéracées      | HA | TH | Circumméd | B: littorales et continentales |
| <i>Gnaphalium luteo-album</i> L.               | Astéracées      | HA | TH | Cosmop    | B: littorales et continentales |
| <i>Helichrysum stoechas</i> (L.) DC.           | Astéracées      | HV | PH | Wméd      | A: dunes littorales            |

|                                                                  |            |    |    |                        |                                |
|------------------------------------------------------------------|------------|----|----|------------------------|--------------------------------|
| <i>Asteriscus maritimus</i> (L.) Less.                           | Astéracées | HV | CH | Canaries,Eur.Mérid.N.A | B: littorales et continentales |
| <i>Xanthium italicum</i> Moretti                                 | Astéracées | LV | PH | Méd                    | B: littorales et continentales |
| <i>Senecio leucanthemifolius</i> Poiret.                         | Astéracées | HV | CH | W méd .canar.syrie     | B: littorales et continentales |
| <i>Anthemis maritima</i> L.                                      | Astéracées | HV | CH | Wméd                   | A: dunes littorales            |
| <i>Cladanthus arabicus</i> (L.) Cass.                            | Astéracées | HA | TH | Méd                    | A: dunes littorales            |
| <i>Atractylis carduus</i> (Forsk.) Christ.                       | Astéracées | HV | HE | Sah                    | C: dunes continentales         |
| <i>Atractylis humilis</i> L.                                     | Astéracées | HV | HE | Ibéro-Maur             | C: dunes continentales         |
| <i>Centaurea involucrata</i> Desf.                               | Astéracées | HA | TH | End.Alg.Mar            | C: dunes continentales         |
| <i>Centaurea pungens</i> Pomel.                                  | Astéracées | HA | TH | Sah                    | C: dunes continentales         |
| <i>Centaurea incana</i> Desf.,non Lag.nec Ten.                   | Astéracées | HA | TH | Ibéro-Maur             | C: dunes continentales         |
| <i>Centaurea solstitialis</i> L.                                 | Astéracées | HA | TH | Méd.As                 | C: dunes continentales         |
| <i>Centaurea ferox</i> Desf.                                     | Astéracées | LV | PH | Alg occ                | B: littorales et continentales |
| <i>Centaurea sphaerocephala</i> L.                               | Astéracées | LV | PH | Méd                    | B: littorales et continentales |
| <i>Scolymus grandiflorus</i> Desf.                               | Astéracées | HV | CH | Euryméd                | B: littorales et continentales |
| <i>Scolymus hispanicus</i> L .                                   | Astéracées | HV | PH | Méd                    | B: littorales et continentales |
| <i>Catananche lutea</i> L.                                       | Astéracées | HV | CH | Méd                    | C: dunes continentales         |
| <i>Catananche coerulea</i> L.                                    | Astéracées | HV | CH | Wméd                   | A: dunes littorales            |
| <i>Tolpis barbata</i> subsp <i>umbellata</i> (L.) Gaerth.        | Astéracées | HA | TH | Méd                    | A: dunes littorales            |
| <i>Urospermum picroides</i> (L.) Schmidt                         | Astéracées | HA | TH | Euryméd                | B: littorales et continentales |
| <i>Tragopogon porrifolius</i> L.                                 | Astéracées | HV | CH | Circumméd              | C: dunes continentales         |
| <i>Reichardia picroides</i> subsp. <i>eu-picroides</i> (L.)Roth. | Astéracées | HV | CH | Méd                    | A: dunes littorales            |
| <i>Reichardia tingitana</i> subsp. <i>eu-tingitana</i> M.        | Astéracées | HV | CH | Ibéro-Mar              | A: dunes littorales            |

|                                                                       |            |    |    |               |                                |
|-----------------------------------------------------------------------|------------|----|----|---------------|--------------------------------|
| <i>Phagnalon saxatile</i> (L.) Cass.                                  | Astéracées | HA | TH | Méd           | A: dunes littorales            |
| <i>Bellis annua</i> L.                                                | Astéracées | HA | TH | Méd           | A: dunes littorales            |
| <i>Inula crithmoides</i> L.                                           | Astéracées | HV | PH | Méd           | A: dunes littorales            |
| <i>Senecio cineraria</i> (L.) DC .                                    | Astéracées | HV | CH | Eur-Mérid.N.A | A: dunes littorales            |
| <i>Astragalus armatus</i> subsp. <i>Tragacanthoides</i> (Desf.) Maire | Fabacées   | LV | PH | End.N.A       | C: dunes continentales         |
| <i>Ononis natrix</i> L.                                               | Fabacées   | HA | TH | Méd           | A: dunes littorales            |
| <i>Lotus edulis</i> L.                                                | Fabacées   | HA | TH | Méd           | B: littorales et continentales |
| <i>Medicago marina</i> L.                                             | Fabacées   | HV | CH | Méd           | A: dunes littorales            |
| <i>Medicago italica</i> (Mill.) Steud.                                | Fabacées   | HA | TH | Méd           | A: dunes littorales            |
